# Supplementary material for: Unique gel of xanthan gum with ionic liquid and its conversion into high performance hydrogel
Source: Royal Society of Chemistry journal article supplement (doi:10.1039/b916864h), 2009-01-01
Supplement: b916864h.pdf [file b916864h.pdf]

## **Electronic Supplementary Information**

### **Unique Gel of Xanthan Gum with Ionic Liquid and Its Conversion into High Performance Hydrogel**

Hironori Izawa, Yoshiro Kaneko and Jun-ichi Kadokawa

#### **Experimental Section**

**Materials.** 1-Butyl-3-methylimidazolium chloride (BMIMCl) was purchased from Sigma-Aldrich Chemical Co. Xanthan gum (viscosity; 1785 cps, 1 wt% solution in 1 wt% KCl aq., 20 °C) was purchased from Tokyo Chemical Industry Co., Ltd. Commercial products of xanthan gum contain a moisture of ca. 11 % and an ash of 6 – 9 %.<sup>1</sup> The values of molecular weight of the xanthan gum samples are generally 2 – 50 x 10<sup>6</sup>.<sup>2</sup> Other reagents were used as commercial grade without further purification.

**Preparation of Xanthan Gum/BMIMCl Gels.** As a typical procedure for the preparation of xanthan gum/BMIMCl gel, xanthan gum (0.10 g, i.e., 9.1 wt%) was added to BMIMCl (1.00 g) and stirred for 3 min at 100 °C to be a homogeneous solution. After the solution was continuously heated at 100 °C for 12 h without stirring, it was kept at room temperature for 30 min to give a xanthan/BMIMCl gel (1.15 g, containing some moisture).

**Preparation of Xanthan Gum Hydrogels (Imidazolium Form).** The 9.1 wt% gel (1.15 g) with BMIMCl obtained according to aforementioned procedure was soaked in water (100 mL) for 24 h to give a hydrogel, which was taken out from the water solution. The obtained hydrogel was lyophilized to estimate the water content, which was calculated to be 94.6 wt%.

**Ion-exchange From Imidazolium Form to Ca<sup>2+</sup> Form in Xanthan Gum Hydrogel.** The aforementioned hydrogel was soaked in 0.2 M CaCl<sub>2</sub> aqueous solution (100 mL) for 48 h to give an ionically cross-linked hydrogel with Ca<sup>2+</sup>, which was taken out from the water solution. The hydrogel was lyophilized to estimate water content, which was calculated to be 85.2 wt %.

**Demonstration of Thermally Induced Shape-memory Effect.** A coiled shape of the 33.3 wt% gel was prepared by heating-cooling process using an appropriate mold. Then, the coiled shape of the gel was deformed to rod shape by heating at ca. 50 °C, which

was fixed by cooling for a few seconds at room temperature. The deformed gel was continuously heated at ca. 50 °C for progress of the thermally induced shape-memory effect.

**Measurements.** The stress-strain curves under the compressive and tensile modes were measured using a tensile tester (Little Senstar LSC-1/30, Tokyo Testing Machine Co.) with a speed of 2.0 mm·min<sup>-1</sup>. Elemental analysis was performed using a Perkin-Elmer 2400 II CHN element analyzer.

### References

1. A. M. Stephen, G. O. Philips and P. A. Williams, *Food polysaccharides and their applications*, Taylor & Francis, London, 1995.
2. S. Rosalam and R. England, *Enzym. Microb. Tech.*, 2006, *39*, 197.
